# Supplementary material for: Appropriate disclosure of a diagnosis of dementia: identifying the key behaviours of 'best practice'
Source: Springer Nature journal article supplement (doi:10.1186/1472-6963-8-95), 2008-05-01
Supplement: Additional file 1 [file 1472-6963-8-95-s1.doc]

# SUMMARY LIST OF BEHAVIOURS AND SOURCES IN DISCLOSING A DIAGNOSIS OF DEMENTIA

**1. PREPARING FOR DISCLOSURE (n=31)**

|  | **BEHAVIOUR** | Literature | Consensus panel | Interviews with pwd |
| --- | --- | --- | --- | --- |
| *Plan disclosure meeting* | Organise a private, quiet, comfortable location | **** | **** | **** |
| Consider holding the disclosure meeting at the patient’s home | **** |  | **** |
| Schedule ample time | **** | **** | **** |
| Indicate the time available in the consultation | **** |  |  |
| Avoid interruptions / distractions | **** |  |  |
| Wait until all test results are available before giving the diagnosis | **** |  | **** |
| Have all information to hand | **** |  |  |
| Include other team members | **** | **** |  |
| Identify the most appropriate team member to disclose to individual patients (based on style, rapport) |  | **** | **** |
| Ensure disclosure done by a professional already known to the patient |  |  | **** |
| Ensure staff responsible for post disclosure counselling at present at the disclosure meeting | **** |  |  |
| Have clear objectives/work out an action plan before speaking to the patient | **** |  |  |
| Identify the most appropriate approach to disclosure based on knowledge of the patient & family | **** | **** | **** |
| Ensure disclosure to patient is done by a professional (not a family member or via letter) |  |  | **** |
| *Arrange post-diagnosis support* | Identify informal support available for the patient after disclosure | **** | **** | **** |
| Identify formal support (i.e. professional or voluntary agency) available for the patient after disclosure | **** | **** | **** |
| *Establish rapport* | Introduce yourself & your role | **** |  |  |
| Attend to the patient’s physical comfort | **** |  |  |
| Establish a trusting & supportive relationship with the patient | **** | **** | **** |
| *Prepare the patient* | Prepare the patient in earlier consultations | **** | **** | **** |
| Break the news over a series of contacts | **** | **** | **** |
| Explain that dementia may be one of the possible diagnoses in earlier consultations | **** |  | **** |
| Explain the process involved in establishing the diagnosis, including the nature & reason for diagnostic tests | **** |  | **** |
| *Elicit preferences re disclosure* | Discuss ahead of time how much information the patient would like about diagnosis & prognosis | **** | **** | **** |
| Avoid disclosing relevant information in attempting to ascertain patient preferences for disclosure | **** | **** |  |
| Respect the patient’s right (not) to know | **** | **** | **** |
| Address with the patient what information will be shared with whom | **** | **** |  |
| Negotiate the presence of a relative with the patient | **** | **** | **** |
| Confirm whether the patient would like a member of the family or friend to stay in the room at the time of disclosure | **** |  |  |
| Offer to tell spouse or others | **** |  |  |
| Seek family approval before disclosing to patients |  | **** |  |

**2. INTEGRATING FAMILY MEMBERS (n=10)**

|  | **BEHAVIOUR** | Literature | Consensus panel | Interviews with pwd |
| --- | --- | --- | --- | --- |
| *Involve appropriate family member(s)* | Encourage the patient to share the diagnosis with significant others | **** |  |  |
| Identify the most appropriate family member / ask the family to identify a spokesperson | **** | **** |  |
| Ensure that the people wanted by the patient are present to hear the diagnosis | **** |  |  |
| Ensure family member(s) know what the patient has been told |  |  | **** |
| *Manage differing information needs of patient & family members* | Arrange to see the patient & family member(s) together & individually to facilitate disclosure of difficult issues & different information needs | **** |  | **** |
| Consider the potential consequences of disclosure to family members |  | **** |  |
| *Avoid collusion with family member(s)* | Avoid collusion by disclosing to the patient first or to the patient & family members together | **** |  |  |
| Assess the reason(s) for any requests to withhold information from the patient | **** |  |  |
| Show appropriate respect for (legal issues relating to) patient confidentiality | **** | **** |  |
| Recognise potential conflicts of interest between patients & family members |  | **** |  |

**3. EXPLORING THE PATIENT’S PERSPECTIVE (n=13)**

|  | **BEHAVIOUR** | Literature | Consensus panel | Interviews with pwd |
| --- | --- | --- | --- | --- |
| *Explore patient ideas* | Establish the patient’s perceptions about their symptoms | **** | **** | **** |
| Identify cultural customs & beliefs about the illness & negotiate differences with respect | **** |  |  |
| Explore what prompted the patient to ask for assessment | **** |  |  |
| Discuss the symptoms & changes the patient & family have noticed | **** |  | **** |
| Ask if s/he has thought what the diagnosis might be | **** |  | **** |
| Find out what the patient already knows | **** | **** |  |
| Clarify the patient’s understanding of past tests & what they mean | **** |  |  |
| Check the strength of their beliefs | **** |  |  |
| Find out where the patient stands at each visit; often patients tend to forget information even if they seemed to fully understand it when first told | **** |  | **** |
| Acknowledge patient’s views & feelings without being judgemental | **** |  | **** |
| Identify the appropriate starting point based on the patient’s current understanding | **** |  |  |
| *Elicit patient expectations* | Elicit patient expectations of the consultation | **** | **** |  |
| Negotiate an agenda taking patient, family member(s) & clinician needs into account | **** |  |  |

**4. DISCLOSING THE DIAGNOSIS (n=33)**

|  | **BEHAVIOUR** | Literature | Consensus panel | Interviews with pwd |
| --- | --- | --- | --- | --- |
| *Tailor information to patient preferences & ideas* | Give information step by step according to the patient’s ability to cope with it | **** | **** | **** |
| Allow the patient to choose when they have heard enough | **** |  | **** |
| Prepare the patient to receive serious news – fire a warning shot | **** |  | **** |
| Relate the explanation to the patient’s ideas, concerns & expectations | **** |  |  |
| Use terminology carefully as a way of getting information across without telling patients what they don’t want to hear | **** | **** | **** |
| Recognise that different family members will have different information needs |  | **** |  |
| Avoid making assumptions about what patients & carers already know (e.g. based on job or previous experience) |  |  | **** |
| *Check understanding* | Check understanding frequently | **** | **** | **** |
| Reinforce areas that patients perceive correctly & gently educate in areas of misunderstanding | **** |  |  |
| Ask the patient to summarise what s/he understands | **** |  |  |
| Draw on the patient’s experiences, those of acquaintances or knowledge from the media, to gauge understanding | **** |  | **** |
| Look for a window on denial to give the patient a chance to review the situation without forcing them to accept reality when they are not ready to do so | **** |  | **** |
| Find out patient’s knowledge level about the disease | **** |  | **** |
| Help the patient understand what the diagnosis means |  |  | **** |
| *Explore the meaning(s) of the diagnosis* | Be honest (about the severity of the condition) | **** |  | **** |
| Give detailed information about the results of medical tests | **** |  | **** |
| Provide supporting evidence for diagnosis | **** |  | **** |
| Be direct in disclosing the diagnosis | **** | **** | **** |
| Explicitly name the illness | **** | **** | **** |
| Provide information on different types of dementia | **** |  | **** |
| Discuss the particular disease process that is causing the dementia | **** |  | **** |
| Give an explanation as to why the changes are happening | **** |  | **** |
| Give the rationale for making the diagnosis | **** |  | **** |
| Acknowledge any diagnostic uncertainty |  | **** |  |
| Explain the relationship between dementia & Alzheimer’s disease |  |  | **** |
| Explain the difference between normal ageing & dementia |  |  | **** |
| *Discuss prognosis* | Discuss how the person’s current problems may progress in the light of the probable diagnosis | **** | **** | **** |
| Describe the behavioural & psychiatric symptoms of dementia | **** |  | **** |
| Explain that individuals are affected differently so there is no exact way to determine progression | **** |  | **** |
| Give a broad timeframe for what may lie ahead | **** |  | **** |
| Explain that there is no curative therapy | **** |  | **** |
| Discuss life expectancy | **** |  | **** |
| Give the rationale for the prognosis |  |  | **** |

**5.** **RESPONDING TO PATIENT REACTIONS (n=24)**

|  | **BEHAVIOUR** | Literature | Consensus panel | Interviews with pwd |
| --- | --- | --- | --- | --- |
| *Explore the patient’s emotional response* | Do not anticipate the patient’s emotional reaction | **** |  |  |
| Acknowledge the difficulty of the issue | **** |  |  |
| Encourage articulation & disclosure of emotion | **** |  | **** |
| Observe the patient’s non-verbal reactions, acknowledge & check your interpretation of cues (e.g. ‘you are looking very worried’) | **** |  | **** |
| Show empathy – express personal concern for the patient’s distress & demonstrate your understanding of their feelings | **** |  | **** |
| Identify the reasons behind the emotional reaction | **** |  | **** |
| Actively manage emotional responses | **** | **** |  |
| Provide an opportunity for the patient to absorb & emotionally process the information | **** | **** | **** |
| Explore feelings of loss associated with the anticipated disability | **** |  | **** |
| Remember that the patient may use denial as a way of choosing not to know the diagnosis | **** |  | **** |
| Avoid giving advice, information or reassurance prematurely | **** |  |  |
| *Elicit & address patient questions & concerns* | Ask the patient what other information would be helpful | **** |  |  |
| Create time & space for the individual to explore what the diagnosis means to them | **** | **** | **** |
| Elicit patient concerns | **** | **** |  |
| Determine all patient concerns before exploring any in depth | **** |  |  |
| Validate patient concerns | **** |  |  |
| (Get patients to) prioritise problems so that they can be addressed in an appropriate order | **** |  |  |
| Explore patient concerns or questions to discover what the individual really believes & why they are asking the question | **** |  |  |
| Discuss patient questions on the same day | **** |  |  |
| Address fears & thoughts about the future | **** |  | **** |
| Recognise that the patient may shut down after hearing bad news & it may take some time before the patient can articulate the questions that are buzzing around in their head | **** |  | **** |
| Since patients may not know the appropriate questions or be hesitant to ask, anticipate critical unanswered questions & suggest discussing them | **** |  | **** |
| Answer questions fully | **** |  | **** |
| If unable to answer questions, explain why not |  |  | **** |

**6. FOCUSING ON QUALITY OF LIFE & WELL-BEING (n=17)**

|  | **BEHAVIOUR** | Literature | Consensus panel | Interviews with pwd |
| --- | --- | --- | --- | --- |
| *Foster hope* | Focus on realistic, rather than unrealistic, hope | **** | **** |  |
| Identify positive aspects to tell the patient | **** |  | **** |
| Emphasise preserved abilities & skills | **** |  | **** |
| Define patient strengths | **** |  |  |
| Emphasise quality of life | **** |  |  |
| Emphasise maintaining social activities | **** |  | **** |
| Focus on maintaining function | **** |  | **** |
| Help the patient to maintain a sense of self |  |  | **** |
| Enhance the patient’s self esteem & self-confidence | **** |  | **** |
| *Explore coping strategies* | Help the patient adapt to the news | **** |  | **** |
| Address the patient’s spiritual values & explore how s/he comes to terms with their suffering | **** |  |  |
| Acknowledge patient coping efforts | **** |  | **** |
| Elicit previous successful strategies used by pwd & family members members to cope with life events & encourage their use in the current situation | **** |  | **** |
| Facilitate family problem-solving regarding patient care | **** |  |  |
| Encourage openness with friends & family members about the changes that are taking place | **** |  |  |
| Ask about patient support systems / social context | **** |  |  |
| Provide an opportunity for the patient to gain some sense of mastery or control over the illness | **** |  | **** |

**7. PLANNING FOR THE FUTURE (n=41)**

|  | **BEHAVIOUR** | Literature | Consensus panel | Interviews with pwd |
| --- | --- | --- | --- | --- |
| *Clarify follow up arrangements* | Provide acute follow up to help patients talk about diagnosis & release emotions | **** |  |  |
| Provide an opportunity to discuss the diagnosis again, answer questions & clarify matters | **** | **** | **** |
| Encourage the patient to return with questions | **** |  | **** |
| Arrange regular follow up to facilitate monitoring of the patient’s progress integrating the diagnosis | **** |  | **** |
| Identify the future named key worker |  | **** | **** |
| Identify other ways for the patient to explore outstanding concerns in the near future | **** |  | **** |
| Ensure information is consistent across professionals | **** | **** | **** |
| Reassure patients that care will continue | **** |  |  |
| *Discuss support services available & the role of other agencies* | Identify further medical & social care pathways | **** | **** | **** |
| Provide (written) information on practical & emotional support available from health & social care services | **** | **** | **** |
| Provide (written) information on practical & emotional support available from relevant voluntary organisations | **** | **** | **** |
| Provide information on memory rehabilitation | **** |  | **** |
| Provide information on opportunities for peer support |  |  | **** |
| Document the information given & to whom | **** | **** | **** |
| Write to GP giving information (copy to pwd & family member) |  | **** | **** |
| *Negotiate management plan* | Identify a plan for what is to happen next | **** |  |  |
| Do not rush the patient to treatment | **** |  |  |
| Offer choice, encourage the patient to make choices & decisions to the level that they wish | **** |  |  |
| Leave serious decisions until the individual has had time to absorb the information | **** |  |  |
| Check clarity & acceptability of plan with patient | **** | **** |  |
| Check that patient concerns have been addressed | **** |  |  |
| Share power & control with patient, recognise that you are both ‘experts’ | **** |  | **** |
| Explain possible unexpected outcomes, what to do if plan is not working, when & how to seek help | **** |  |  |
| Encourage patient to be involved in implementing plans, to take responsibility & to be self reliant | **** |  |  |
| Individualise & target support to the patient & their family | **** |  |  |
| Identify the (practical) implications of the diagnosis | **** | **** | **** |
| Mention legal & financial issues, power of attorney, benefits & wills | **** |  | **** |
| Explore issues of capacity & consent | **** | **** |  |
| Disclose all the treatment options (including no action) | **** | **** | **** |
| Provide information on treatment offered (e.g. name, how it works, side effects, benefits & advantages) | **** |  | **** |
| Explain how drug treatment will be managed (efficacy assessment; NICE guidelines; withdrawal criteria) |  |  | **** |
| Explain reasons for treatment |  |  | **** |
| Address any differences of opinion with patients so that, together, you reach a conclusion that is acceptable & safe for the patient | **** |  | **** |
| Offer specific suggestions on how they might manage the day to day consequences of impairment | **** |  | **** |
| *Discuss prevention & health promotion* | Discuss the role of ill health, fatigue & the environment in exacerbating confused behaviour | **** |  | **** |
| Discuss how crises might be prevented | **** |  |  |
| Offer early psychosocial intervention to prevent future medical & social crises | **** |  |  |
| Emphasise the importance of prompt treatment of concurrent infections | **** |  |  |
| Discuss the importance of maintaining general health & nutrition | **** |  |  |
| Provide information on the interactive role of patient & family member well-being in crisis prevention | **** |  |  |
| Seek consent or assent for inclusion on any disease management or mental health registers |  | **** |  |

**8. COMMUNICATING EFFECTIVELY (n=51)**

|  | **BEHAVIOUR** | Literature | Consensus panel | Interviews with pwd |
| --- | --- | --- | --- | --- |
| *Develop rapport* | Maintain eye contact | **** |  |  |
| Use physical contact as appropriate | **** |  |  |
| Attract the patient’s attention before speaking | **** |  |  |
| Allay yourself with the patient through use of ‘we’ in describing management plans etc. | **** |  |  |
| Create an environment in which patients feel comfortable asking questions | **** |  | **** |
| *Use appropriate verbal & non-verbal communication* | Use simple language (active, declarative sentences) | **** |  |  |
| Avoid the over-use of pronouns | **** |  |  |
| Use high frequency common words | **** |  |  |
| Use the same language that the patient uses | **** |  |  |
| Ask concise, specific questions | **** |  |  |
| Check for understanding of yes/no questions |  |  | **** |
| Avoid euphemisms | **** |  | **** |
| Avoid the use of technical terminology or medical jargon | **** | **** | **** |
| Make intonation patterns obvious, clearly signal questions | **** |  |  |
| Avoid speaking too slowly (this increases the load on working memory) | **** |  |  |
| Repeat or reinforce information as required | **** | **** | **** |
| Consider providing a tape recording of the consultation | **** |  |  |
| Use pauses & syllables & word stress to highlight information | **** |  |  |
| Use gestures & facial expressions to convey information | **** |  |  |
| Adopt a non-confrontational style |  |  | **** |
| Avoid sending non-verbal messages that undermine the verbal message being conveyed | **** |  |  |
| Avoid body language that signals restlessness, lack of commitment or rejection | **** |  |  |
| Use visual methods of conveying information to aid comprehension & recall | **** |  | **** |
| ‘Walk’ patients through reading materials rather than leaving them to read the information on their own | **** |  | **** |
| Provide clear written information (on diagnosis) |  | **** | **** |
| *Use active listening skills* | Listen attentively | **** |  |  |
| Do not interrupt the patient, it is confusing & may cause them to forget what they were going to say | **** |  |  |
| Pay attention to the patient’s emotional expression as it may be more reliably meaningful than their words (respond to the message not the words) | **** |  |  |
| Attend to verbal & non-verbal cues | **** |  |  |
| Consider helping the patient with word-finding difficulties by suggesting the target word (‘Do you mean….?) | **** |  |  |
| *Involve the patient* | Leave space for patient to think before answering or to continue after pausing | **** |  |  |
| Facilitate patient responses verbally & non-verbally (e.g. encouragement, silence, paraphrasing, repetition) | **** |  |  |
| Check out patient statements which are vague or need amplification | **** |  |  |
| Periodically summarise to verify own understanding of what the patient has said | **** |  |  |
| Be patient-centred |  | **** |  |
| Do not talk over the patient | **** |  |  |
| Identify behaviours that are suggestive of unresolved concerns or expectations (e.g. reluctance to accept management plan) | **** |  |  |
| Address the patient directly |  |  | **** |
| *Structure & signpost the consultation* | Summarise at the end of each section before moving on | **** |  |  |
| Minimise or limit the number of topic changes | **** |  |  |
| Use transitional statements when moving onto a new area to signpost change of topic | **** |  |  |
| Structure interview in a logical sequence | **** |  |  |
| Do not impart too much information in one session | **** | **** | **** |
| Organise information into discrete chunks, develop a logical sequence | **** |  |  |
| Summarise the session briefly | **** |  | **** |
| *Consider issues of anti-discriminatory practice* | Show respect for the fundamental worth of all persons | **** |  | **** |
| Show respect for the values & beliefs of all cultural groups | **** |  |  |
| Be aware of personal values & cultural differences & how these might influence interactions | **** |  |  |
| Be aware of emotional reactions to patients | **** |  |  |
| Be aware of personal strengths & weaknesses in working with patients | **** |  |  |
| Arrange an interpreter if necessary (avoid using family members as translators) | **** | **** |  |
